# Supplementary material for: Low anti-RhD IgG-Fc-fucosylation in pregnancy: a new variable predicting severity in haemolytic disease of the fetus and newborn
Source: PubMed Central journal article supplement — Br J Haematol. 2014 Jun 7;166(6):936–45. doi: 10.1111/bjh.12965 (PMC4282073; doi:10.1111/bjh.12965), 2014-06-07
Supplement: bjh0166-0936-SD1.pdf [file bjh0166-0936-SD1.pdf]

**Supplementary Table 1:**

Overview of samples used for analysis of anti-D titer/fucosylation vs fetal (F) or neonatal (N) hemoglobin levels. (See Figure 4).

| Fetal (F) or neonatal (N) hemoglobin (mmol/L) | Anti-D titer | Anti-D IgG1 fucosylation (%) | % Anti-D IgG1 (of IgG1 and IgG3) |
|-----------------------------------------------|--------------|------------------------------|----------------------------------|
| 8.8 (F)                                       | 16           | 68.4                         | 100                              |
| 11.1 (F)                                      | 32           | 79.9                         | 100                              |
| 8.6 (F)                                       | 256          | 45.5                         | 100                              |
| 9 (N)                                         | 32           | 78.2                         | 100                              |
| 3.4 (F)                                       | 16           | 44.8                         | 100                              |
| 11.7 (F)                                      | 8            | 84                           | 100                              |
| 5.8 (N)                                       | 64           | 87.6                         | 100                              |
| 8.5 (N)                                       | 128          | 29.3                         | 100                              |
| 9.8 (F)                                       | 4            | 80.4                         | 100                              |
| 7.9 (F)                                       | 8            | 30.8                         | 100                              |
| 3.6 (F)                                       | 128          | 39.5                         | 75.7                             |
| 5.2 (F)                                       | 128          | 20.4                         | 100                              |

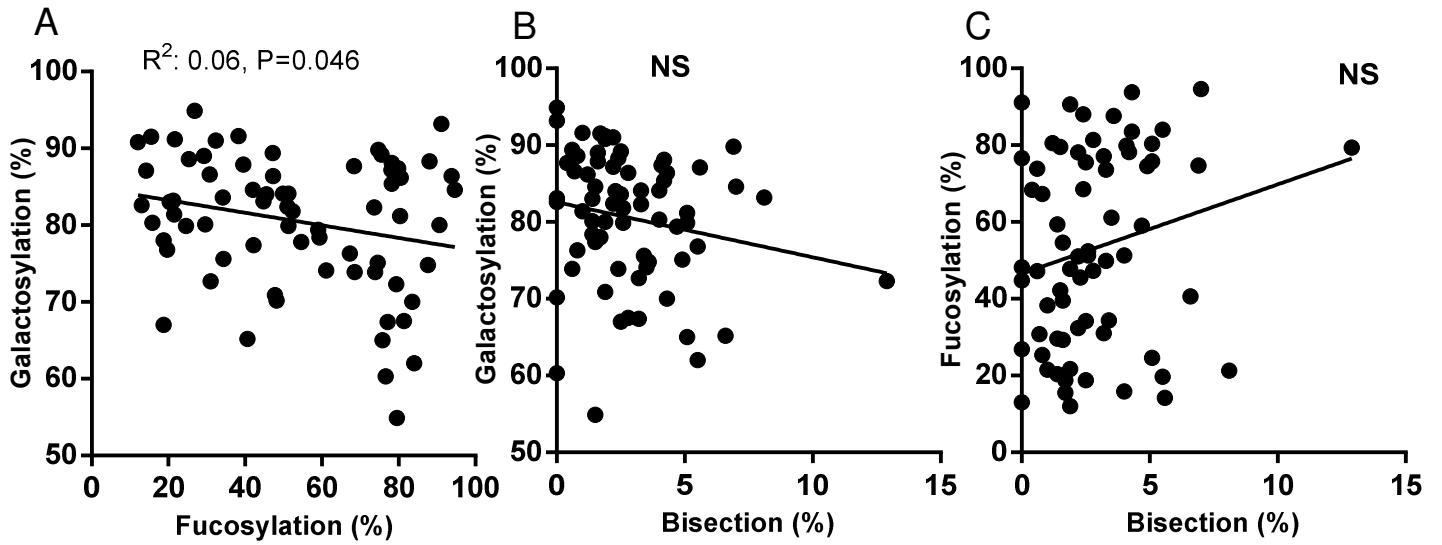

**Supplementary Figure 1:**

The relationships between the degree of glycosylation of anti-D IgG1 for A) galactosylation and fucosylation, B) galactoylation and bisection, and (C) fucosylation and bisection. Significance was tested by two-tailed Pearson's correlation, and significance was set at 0.05. NS: non-significant.

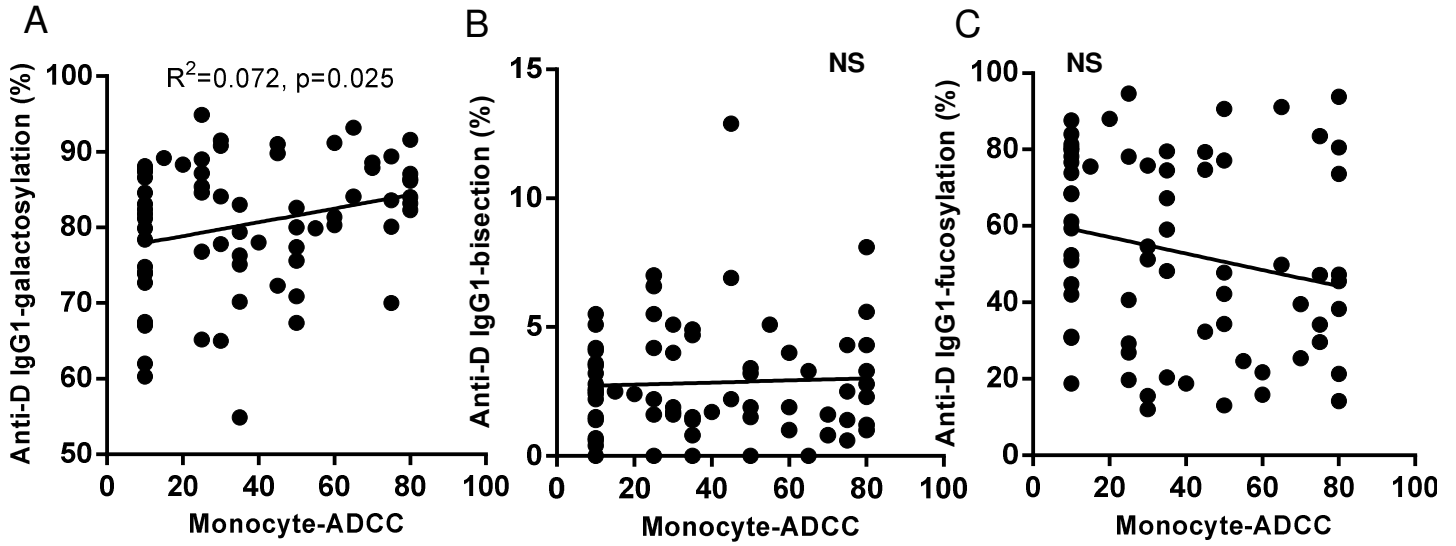

**Supplementary Figure 2:**

The relationship between monocyte ADCC and anti-D IgG1-galactosylation, bisection and fucosylation. Monocyte ADCC versus the levels of galactosylation (A), bisection (B) and fucosylation (C). For the monocyte-ADCC the data for all samples were plotted, Statistical analyses were performed using two-tailed Pearson correlation and significance was set at 0.05. NS: non-significant.

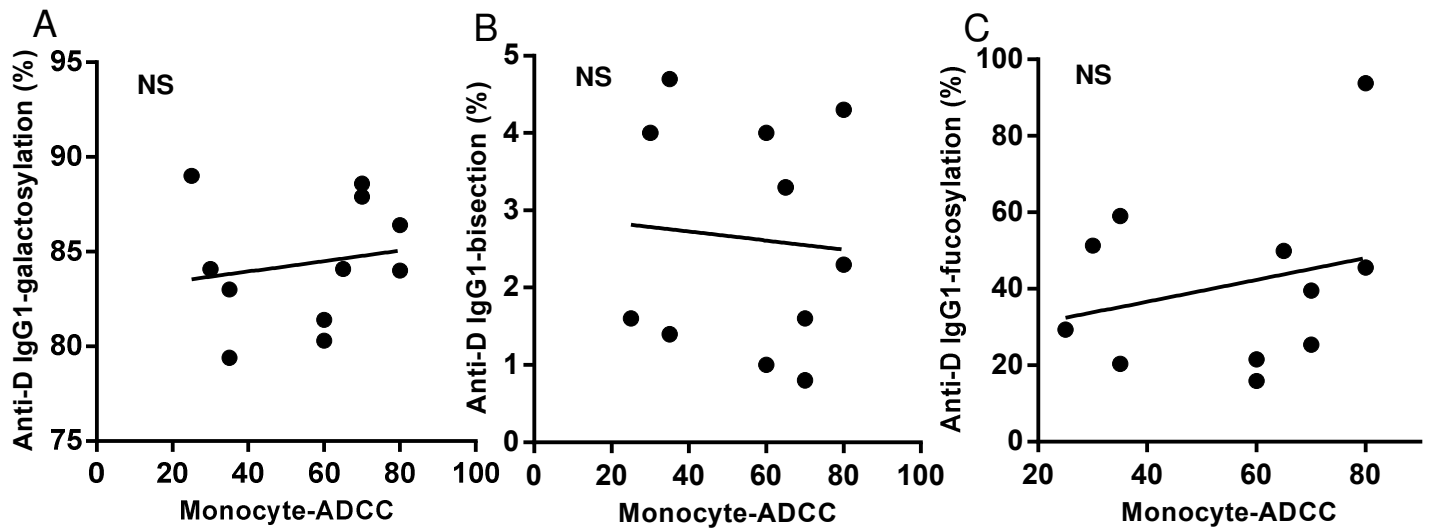

**Supplementary Figure 3:**

Monocyte-mediated ADCC towards RBC vs glycosylation of anti-D IgG1 using the same set of samples as in Fig. 3), shown for A) galactosylation, B) bisection, C) fucosylation.

Significance was tested by two-tailed Pearson's correlation. Significance was set at 0.05.

NS: non-significant

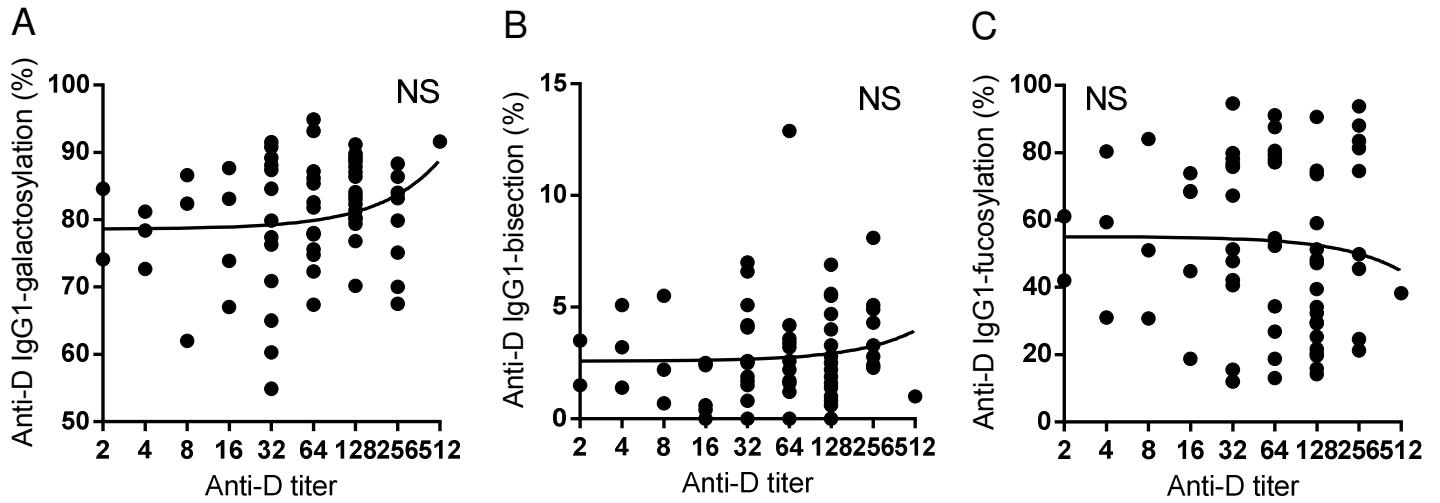

**Supplementary Figure 4:**

The relationship between anti-D titer and anti-D IgG1-galactosylation, bisection and fucosylation. Anti-D titer versus the levels of galactosylation (A), bisection (B) and fucosylation (C). All samples were plotted, Statistical analyses were performed using two-tailed Pearson correlation and significance was set at 0.05. NS: non-significant.
